# Supplementary material
Source: PubMed Central journal article supplement (PMC7096898)
Supplement: 41594_2020_385_MOESM1_ESM.pdf [file 41594_2020_385_MOESM1_ESM.pdf]

In the format provided by the authors and unedited.

# SRSF7 maintains its homeostasis through the expression of Split-ORFs and nuclear body assembly

Vanessa Königs<sup>1,7</sup> , Camila de Oliveira Freitas Machado<sup>1,7</sup>, Benjamin Arnold<sup>1,7</sup> , Nicole Blümel<sup>1,7</sup>, Anfisa Solovyeva<sup>1</sup>, Sinah Löbbert<sup>1</sup>, Michal Schafranek<sup>1</sup>, Igor Ruiz De Los Mozos<sup>2,3</sup> , Ilka Wittig<sup>4</sup>, Francois McNicoll<sup>1</sup> , Marcel H. Schulz<sup>5,6</sup>  and Michaela Müller-McNicoll<sup>1</sup> 

---

<sup>1</sup>Institute of Cell Biology and Neuroscience, Goethe University, Frankfurt am Main, Germany. <sup>2</sup>The Francis Crick Institute, London, UK. <sup>3</sup>Department of Neuromuscular Disease, UCL Institute of Neurology, London, UK. <sup>4</sup>Functional Proteomics Group, Centre of Biochemistry, Medical School, Goethe University, Frankfurt am Main, Germany. <sup>5</sup>Institute of Cardiovascular Regeneration, Medical School, Goethe University, Frankfurt am Main, Germany. <sup>6</sup>German Centre for Cardiovascular Research, Partner site RheinMain, Frankfurt am Main, Germany. <sup>7</sup>These authors contributed equally: Vanessa Königs, Camila de Oliveira Freitas Machado, Benjamin Arnold, Nicole Blümel. ✉e-mail: [mcnicoll@bio.uni-frankfurt.de](mailto:mcnicoll@bio.uni-frankfurt.de); [mueller-mcnicoll@bio.uni-frankfurt.de](mailto:mueller-mcnicoll@bio.uni-frankfurt.de)

## Supplementary material

### Supplementary tables

**Table S1: SRSF7 binds strongly to its own pre-mRNA.** Counts of normalized significant crosslink events (X-links) that map to the entire mouse *SRSF7* gene or separately to the indicated segments quantified from SRSF3- and SRSF7-GFP iCLIP datasets without OE.

| X-links           | SRSF7   | SRSF3   |
|-------------------|---------|---------|
| all               | 1202024 | 1644147 |
| ORF               | 9899    | 218     |
| 5'UTR             | 1234    | 24      |
| 3'UTR             | 858     | 111     |
| Introns           | 19041   | 400     |
| <i>SRSF7</i> gene | 31032   | 753     |
| Percentage (%)    | 2.58    | 0.05    |

**Table S2: The *SRSF7*-PCE isoform is translated.** Spearman correlation coefficients (Rs) of Ribo-Seq replicates, the number of Ribo-Seq reads that map specifically to the *SRSF7*-PCE isoform, and junction reads mapping to the junction between exon 3 and the PCE.

| Sample          | Correlation Repl (Rs) | Reads <i>SRSF7</i> -PCE | Junction Reads PCE |
|-----------------|-----------------------|-------------------------|--------------------|
| WT              | 0.987                 | 6707                    | 0                  |
| <i>SRSF7</i> OE | 0.992                 | 22246                   | 8                  |

**Table S3: Comparison piCLIP vs. iCLIP.** Numbers of crosslink events (X-links) quantified from iCLIP and piCLIP data (pooled monosomal and polysomal fractions of 2 replicates each) that map to the entire mouse *SRSF7* gene or separately to the PCE.

| X-links        | iCLIP   | piCLIP |
|----------------|---------|--------|
| all            | 4077052 | 105753 |
| <i>SRSF7</i>   | 35549   | 1708   |
| PCE            | 11913   | 643    |
| Percentage (%) | 33.5    | 37.6   |

**Table S4: Binding of SRSF7 variants on the *SRSF7* gene.** Numbers of total crosslink events (X-links) and X-links that map to the *SRSF7* gene in pooled iCLIP samples (2 replicates).

| Protein         | Significant X-links (FDR<0.05) | X-links on <i>SRSF7</i> gene (%) |
|-----------------|--------------------------------|----------------------------------|
| SRSF7 endo (WT) | 24590                          | 1.09                             |
| SRSF7 endo (OE) | 24803                          | 12.95                            |
| SRSF7_RRM       | 5707                           | 15.54                            |
| SRSF7-GFP       | 57239                          | 14.43                            |
| noAb            | 31                             |                                  |
| noUV            | 27                             |                                  |

**Table S5: Exon 5-6 junction reads.** Quantification of junction reads from RNA-Seq data to estimate the expression levels of the four *SRSF7* isoforms in P19 cells.

| Isoform       | WT         | (%)   | OE          | (%)   |
|---------------|------------|-------|-------------|-------|
| Full-length   | 124        | 47.15 | 959         | 50.63 |
| $\Delta$ YFQ  | 118        | 44.87 | 740         | 39.07 |
| $\Delta$ 11aa | 19         | 7.22  | 180         | 9.50  |
| $\Delta$ 27aa | 2          | 0.76  | 15          | 0.79  |
| <b>Total</b>  | <b>263</b> |       | <b>1894</b> |       |

**Table S6: Numbers of X-links and significant binding sites of pooled iCLIP replicates and controls.**

| Protein       | Unique X-links | Sign. X-links (FDR<0.05) | Sign. binding sites |
|---------------|----------------|--------------------------|---------------------|
| SRSF7 (OE)    | 166214511      | 4232166                  | 247028              |
| mutZn         | 17800599       | 4244001                  | 305302              |
| $\Delta$ 27aa | 735538         | 85119                    | 11485               |
| noUV          | 34027          | 1251                     | 404                 |

**Table S7. Human NMD targets of RNA-binding proteins with encoded Split-ORFs**

**Table S8: Most enriched protein domains within Split-ORFs (human).**

| <b>PFAM_ID</b> | <b>Domain</b>           | <b>Number</b> | <b>odds ratio</b> | <b>P-value</b> | <b>FDR</b> |
|----------------|-------------------------|---------------|-------------------|----------------|------------|
| PF00400        | WD40 repeat             | 49            | 2.7563            | 0.0000         | 0.0000     |
| PF13768        | Von-Willebrand-factor A | 7             | 9.3710            | 0.0001         | 0.0204     |
| PF00076        | RNA recognition motif   | 35            | 2.0286            | 0.0004         | 0.0543     |
| PF16212        | P-type ATPase           | 7             | 6.6934            | 0.0004         | 0.0543     |
| PF16300        | WD40 repeat             | 6             | 8.0322            | 0.0005         | 0.0610     |
| PF00035        | dsRNA binding motif     | 7             | 5.5123            | 0.0010         | 0.0911     |
| PF01302        | CAP-Gly domain          | 6             | 6.6934            | 0.0010         | 0.0911     |
| PF00412        | Zinc finger, LIM-type   | 15            | 2.7138            | 0.0012         | 0.0919     |
| PF00105        | Zinc finger, C4-type    | 12            | 3.1502            | 0.0012         | 0.0919     |
| PF00191        | Annexin-like            | 6             | 6.1786            | 0.0014         | 0.0919     |

**Table S9. Protein domains within Split-ORFs (human and mouse)**

**Table S10. Ribo-seq read counts in unique NMD exons of RBPs (human and mouse)**

**Table S12. Primers used in this study**

| Primer                            | Sequence (5' → 3')                                             | T <sub>m</sub> [°C] | Purpose |
|-----------------------------------|----------------------------------------------------------------|---------------------|---------|
| <i>SRSF7</i> exon1 fw             | CATCATGTCACGCTACGGGC                                           | 69                  | RT-PCR  |
| <i>SRSF7</i> exon8 rev            | ACGGGTGAACTTGAGAACTTCAG                                        | 66                  | RT-PCR  |
| <i>SRSF7</i> exon2 fw             | ATGCAGTTCGAGGATTGGAT                                           | 63                  | RT-PCR  |
| <i>SRSF7</i> intron5 fw           | AGGGAGGAGAGACCCAATTCCCC                                        | 76                  | RT-PCR  |
| <i>SRSF7</i> exon6 rev            | ATCTTGATCTCGACCTTGAG                                           | 58                  | RT-PCR  |
| <i>SRSF7</i> 3'UTR rev            | TGGTTGATGATGATCCTTCCTAGGTT                                     | 65                  | RT-PCR  |
| <i>GFP</i> rev                    | ACTTCCAGGCTCGACGAACC                                           | 69                  | RT-PCR  |
| <i>SRSF3</i> exon1 fw             | TGCATCGTGATTCCCTGTCCC                                          | 68                  | RT-PCR  |
| <i>SRSF3</i> exon7 rev            | CCTTTCATTTGACCTAGATCGG                                         | 64                  | RT-PCR  |
| <i>CalR</i> fw                    | TCAAGTCCGGGACAATCTTTG                                          | 63                  | RT-PCR  |
| <i>CalR</i> rev                   | TCCTCTTTACGCTTCTTGTCCCTC                                       | 63                  | RT-PCR  |
| <i>BA</i> _spliced_fw             | GAGCACAGCTTCTTTGCAGCTC                                         | 63                  | RT-PCR  |
| <i>BA</i> _spliced_rev            | CTGGGTCATCTTTTCACGGTTG                                         | 63                  | RT-PCR  |
| <i>BA</i> _unspliced_fw           | AAGCCTGGGGTTTTCTTGGG                                           | 63                  | RT-PCR  |
| <i>GAPDH</i> fw                   | GTTTGTGATGGGTGTGAACCACGAG                                      | 63                  | qPCR    |
| <i>GAPDH</i> rev                  | GAGTGGGAGTTGCTGTTGAGGTCGC                                      | 63                  | qPCR    |
| <i>U6</i> _fw                     | GCTCGCTTCGGCAGC                                                | 63                  | qPCR    |
| <i>U6</i> _rev                    | AAATATGGAACGCTTCACGAATT                                        | 63                  | qPCR    |
| <i>SRSF7</i> Intron3 fw           | AAGAGGGTCGACCTGCAAAC                                           | 63                  | qPCR    |
| <i>SRSF7</i> Intron3 rev          | AGTGTTTGTGTACCTCTGCTGAA                                        | 63                  | qPCR    |
| <i>SRSF7</i> PCE short fw         | CAAGCCTCATCTGGCTCTTTTG                                         | 63                  | qPCR    |
| <i>SRSF7</i> PCE short rev        | CTAGATCGTGACCTCAAGGTCTA                                        | 63                  | qPCR    |
| <i>SRSF7</i> PCE long fw          | CAAGCCTCATCTGGCTCTTTTG                                         | 63                  | qPCR    |
| <i>SRSF7</i> PCE long rev         | CTAGATCGTGACCTTGCAAGTTT                                        | 63                  | qPCR    |
| 3'RACE RT rev                     | CCAGTGAGCAGAGTGACGAGGACTGAGCT<br>CAAGCTTTTTTTTTTTTTTTTTTTTTTTT | 82                  | 3'RACE  |
| 3'RACE PCR rev                    | CCAGTGAGCAGAGTGACGAGGACTCGAGC<br>TCAAGC                        | 63                  | 3'RACE  |
| <i>SRSF7</i> OE <i>NheI</i> fw    | GCGCTAGCATGTCACGCTACGGGCGGT                                    | 72                  | cloning |
| <i>SRSF7</i> OE <i>KpnI</i> rev   | GCGGTACCGCGTCCATTCTTTCTGGACT                                   | 70                  | cloning |
| <i>SRSF7</i> _RRM <i>KpnI</i> rev | GCGGTACCAGGCGACTGACTCAAACGAAG                                  | 70                  | cloning |
