# Supplementary material
Source: PubMed Central journal article supplement (PMC7096898)

SRSF7 SRSF7\_RRM  
In IgG GFP In IgG GFP

SRSF7 SRSF7\_RRM  
In IgG GFP In IgG GFP

180 kDa  
130 kDa  
100 kDa  
70 kDa  
55 kDa  
40 kDa  
35 kDa  
25 kDa  
15 kDa  
10 kDa

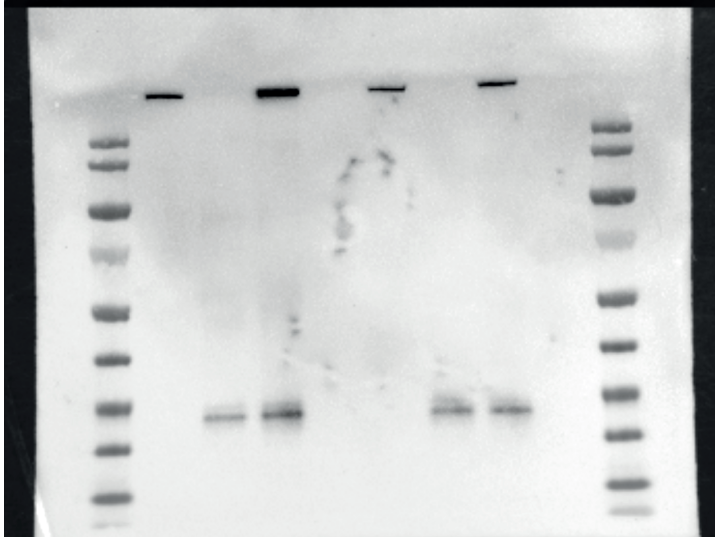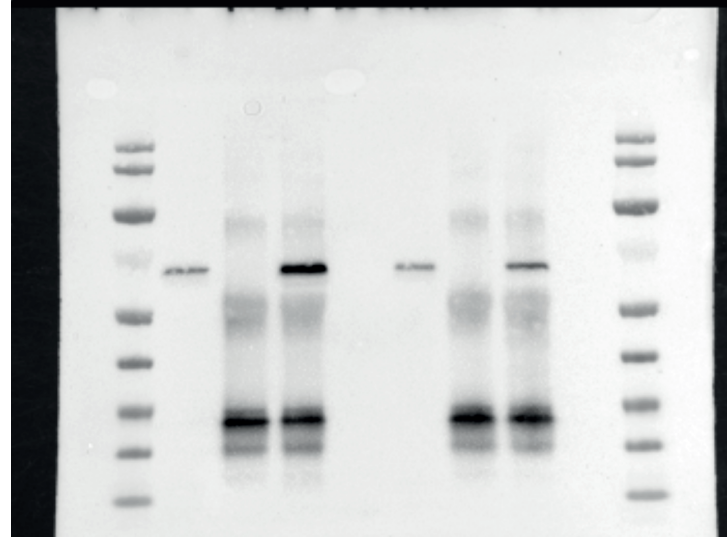

IP:  $\alpha$ -GFP, +RNase  
WB:  $\alpha$ -PRP8

IP:  $\alpha$ -GFP, +RNase  
WB:  $\alpha$ -U170K

SRSF7 SRSF7\_RRM  
In IgG GFP In IgG GFP

SRSF7 SRSF7\_RRM  
In IgG GFP In IgG GFP

180 kDa  
130 kDa  
100 kDa  
70 kDa  
55 kDa  
40 kDa  
35 kDa  
25 kDa  
15 kDa  
10 kDa

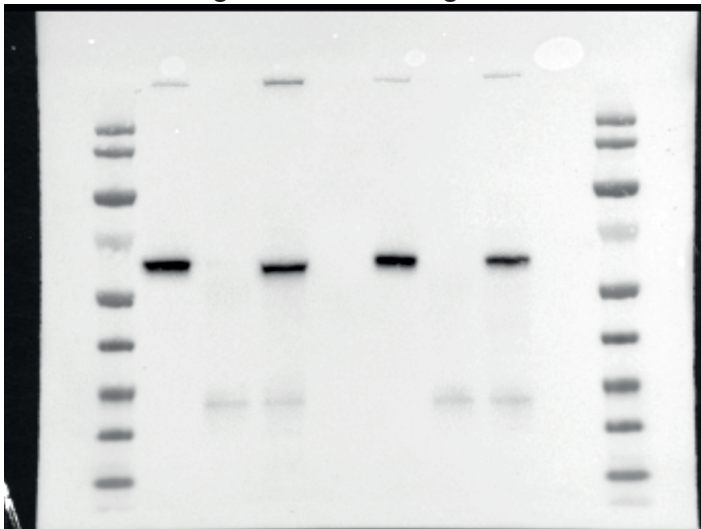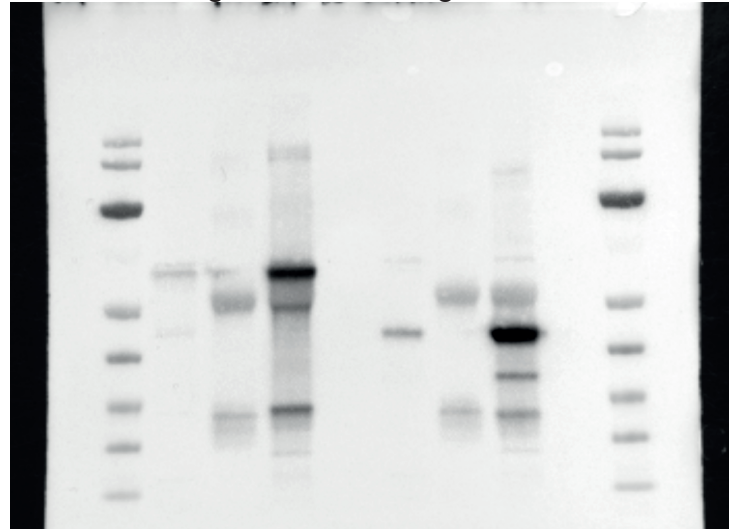

IP:  $\alpha$ -GFP, +RNase  
WB:  $\alpha$ -U2AF65

IP:  $\alpha$ -GFP, +RNase  
WB:  $\alpha$ -GFP

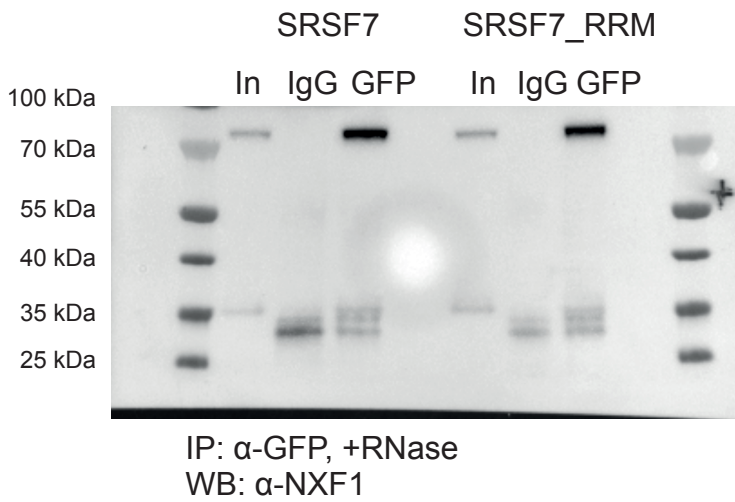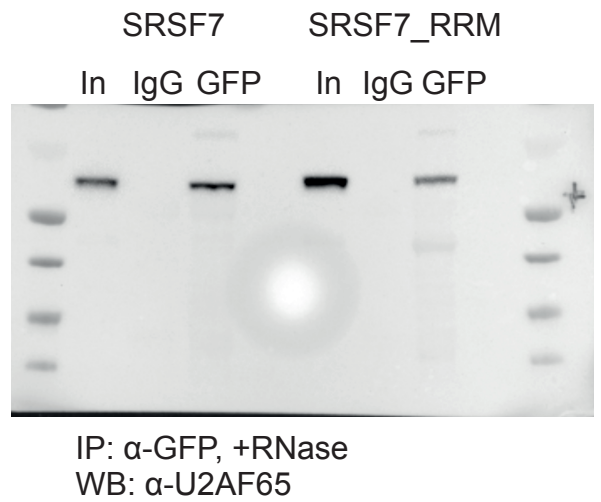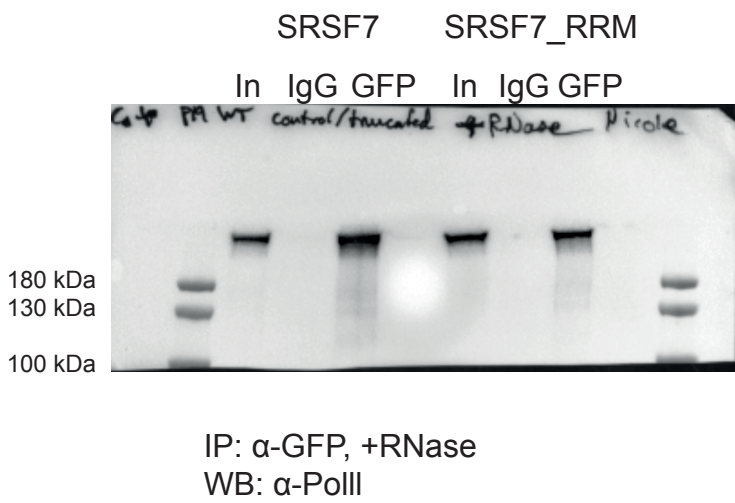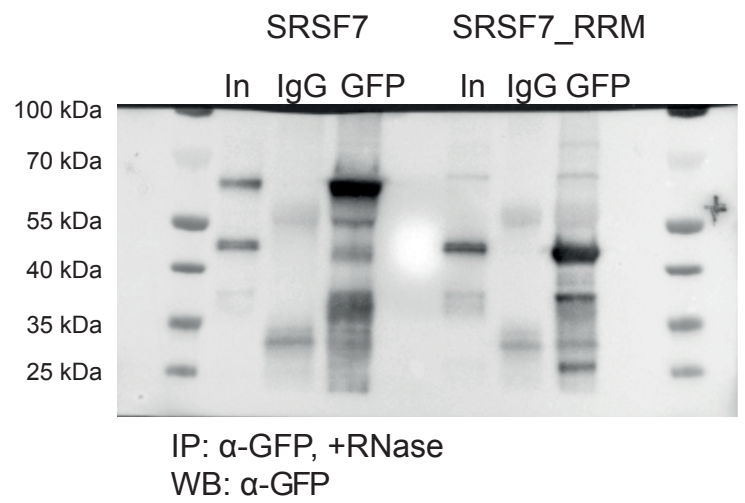

Supplement: 41594_2020_385_MOESM9_ESM.pdf [file 41594_2020_385_MOESM9_ESM.pdf]
