# Supplementary material
Source: PubMed Central journal article supplement (PMC7096898)
Supplement: 41594_2020_385_MOESM14_ESM.pdf [file 41594_2020_385_MOESM14_ESM.pdf]

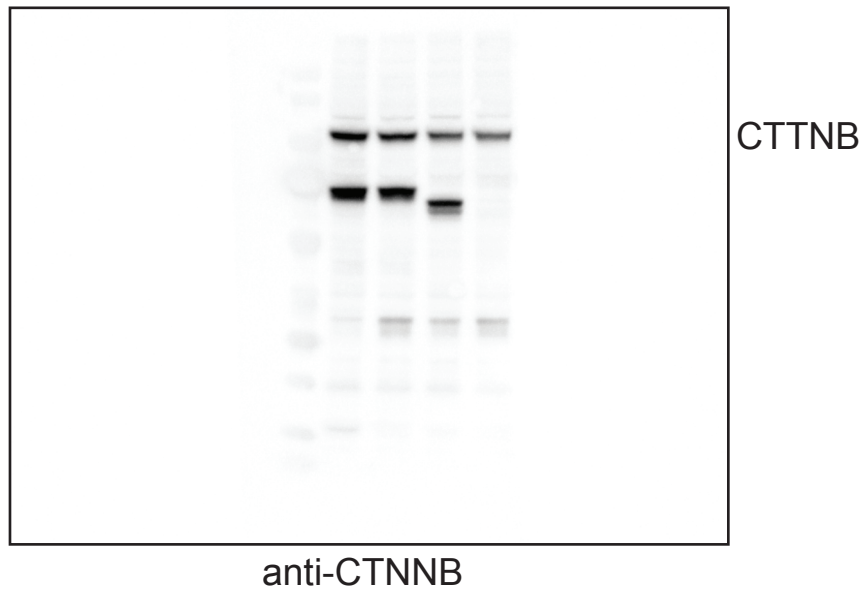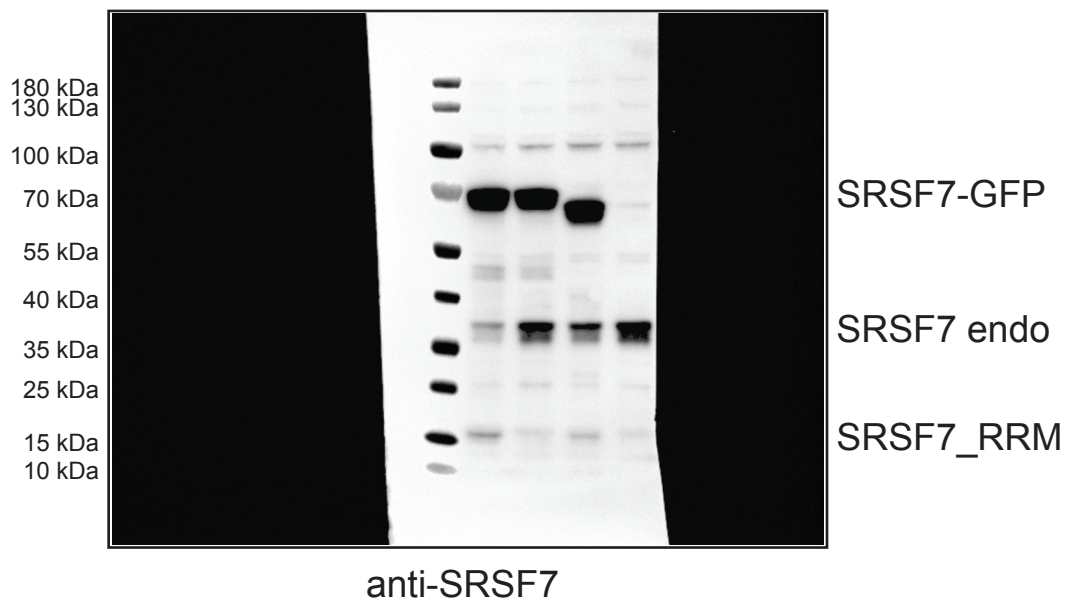

Source data Figure 6C

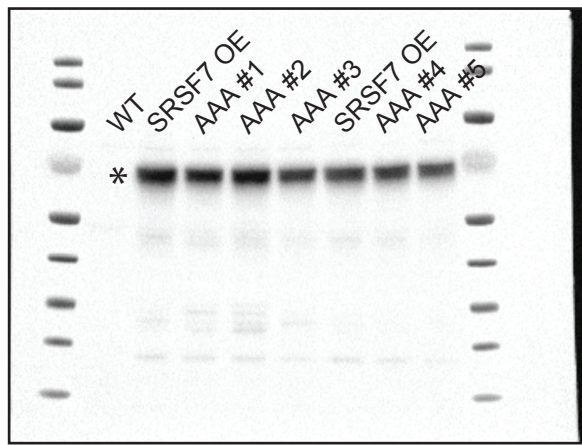

SRSF7-GFP

anti-GFP (low exposure)

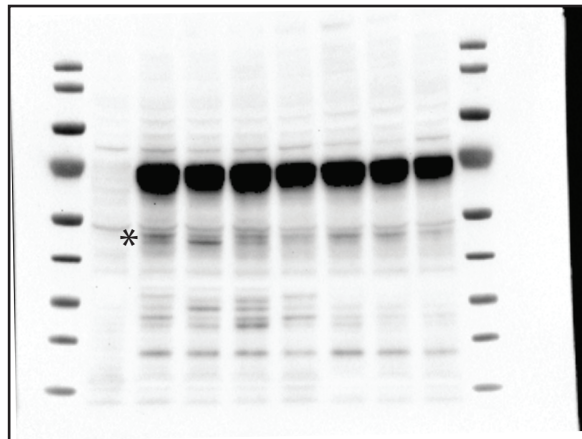

SRSF7-GFP  
SRSF7\_RS

anti-GFP (high exposure)

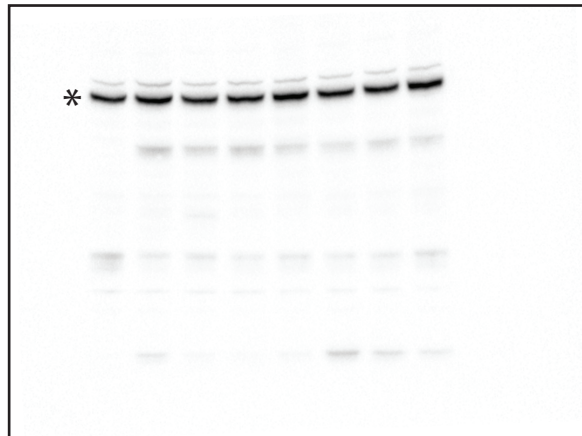

CTNNB

anti-CTNNB

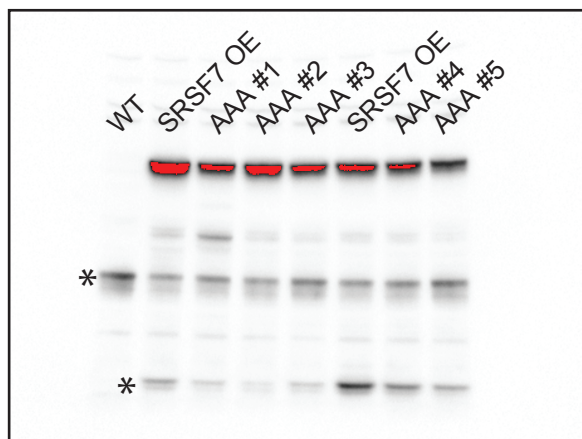

SRSF7-GFP

SRSF7\_endo

SRSF7\_RRM

anti-SRSF7 (high exposure)
