# Supplementary material
Source: PubMed Central journal article supplement (PMC7096898)

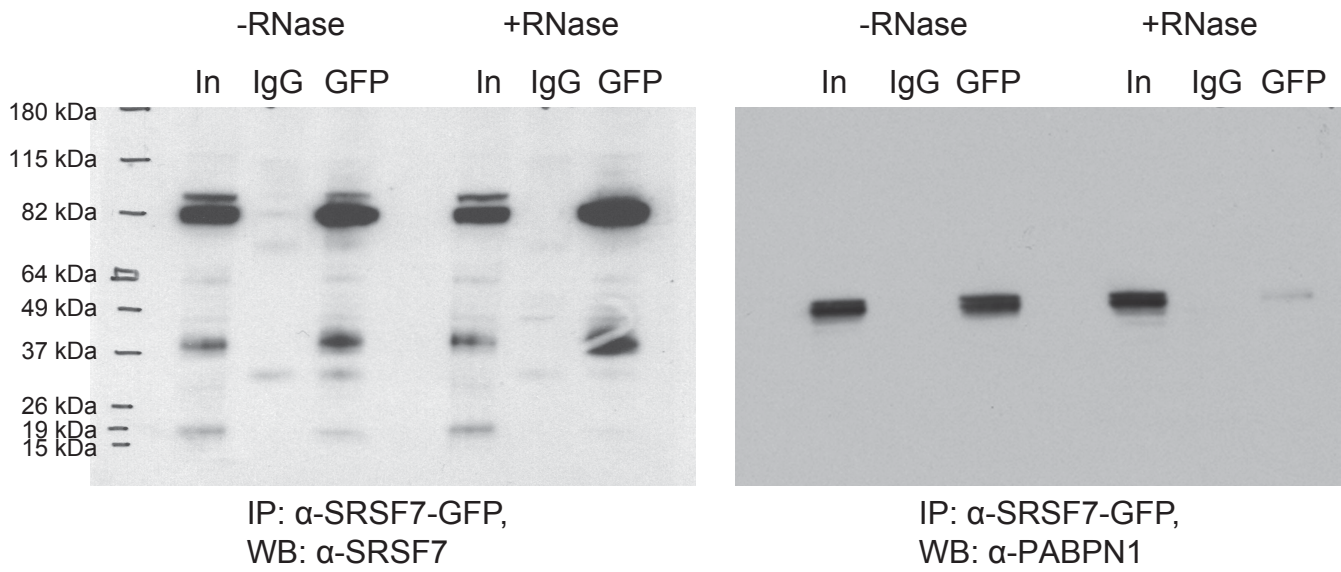

Supplement: 41594_2020_385_MOESM12_ESM.pdf [file 41594_2020_385_MOESM12_ESM.pdf]

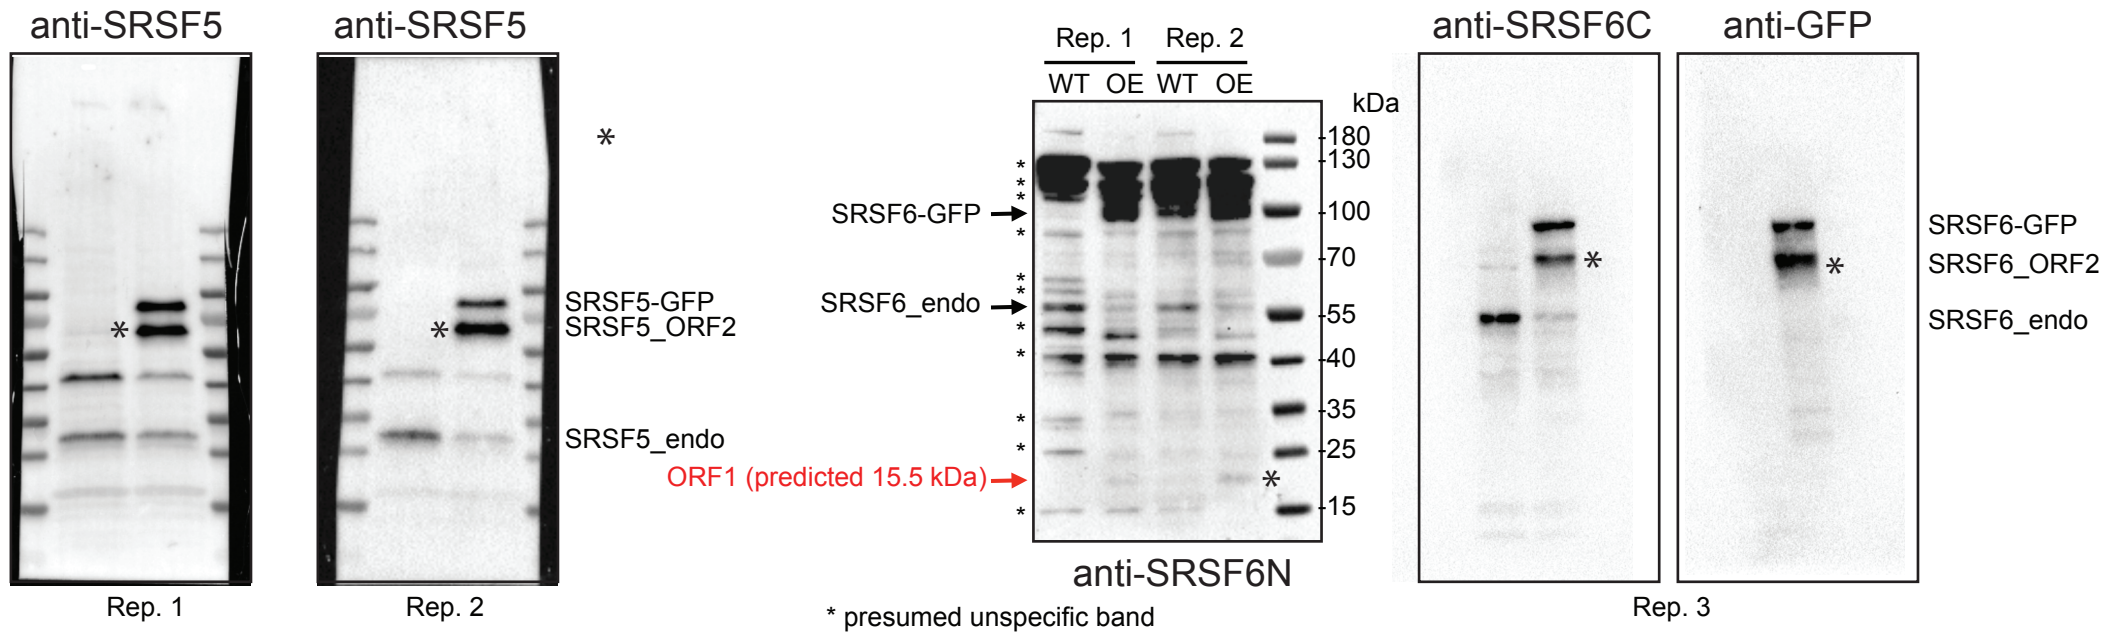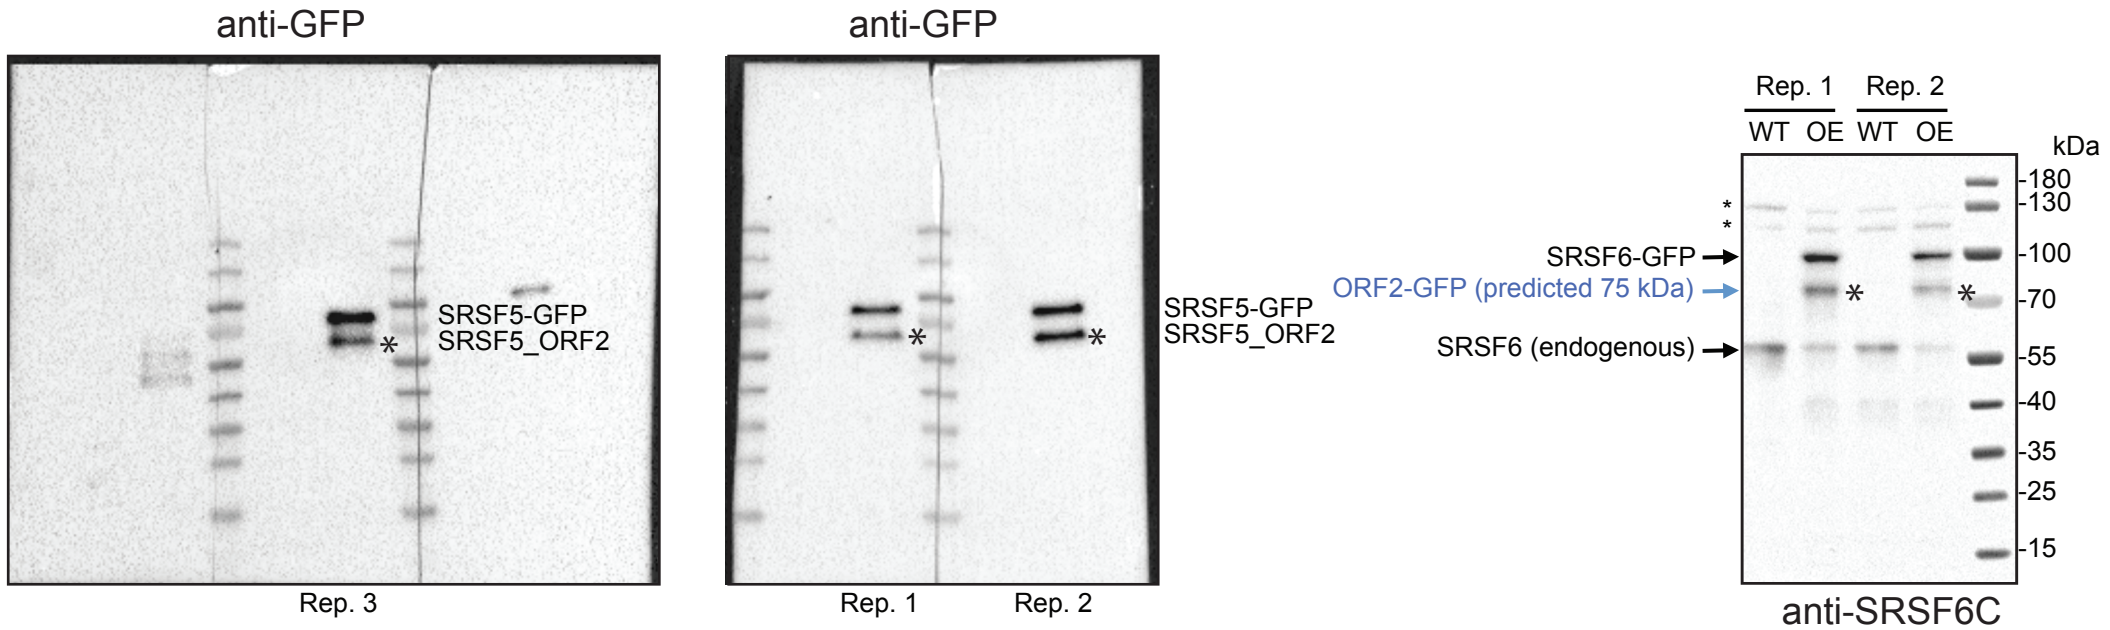

Source data Figure 7E

Supplement: 41594_2020_385_MOESM17_ESM.pdf [file 41594_2020_385_MOESM17_ESM.pdf]

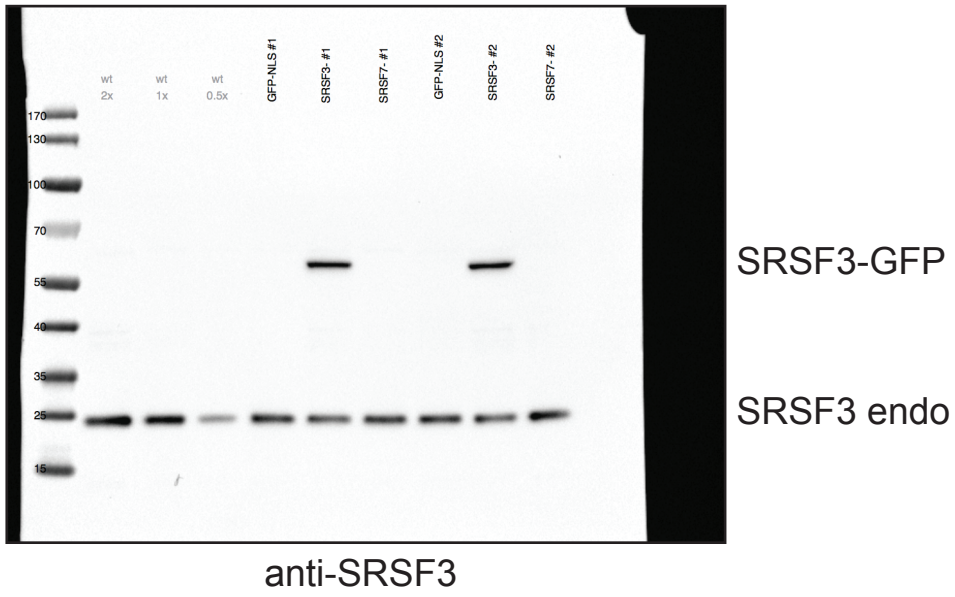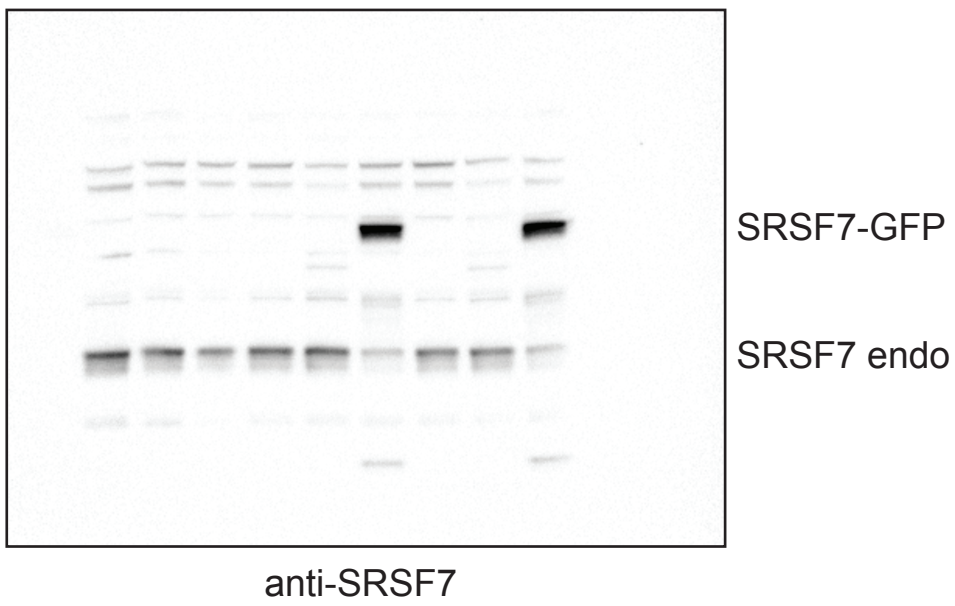

Supplement: 41594_2020_385_MOESM6_ESM.pdf [file 41594_2020_385_MOESM6_ESM.pdf]

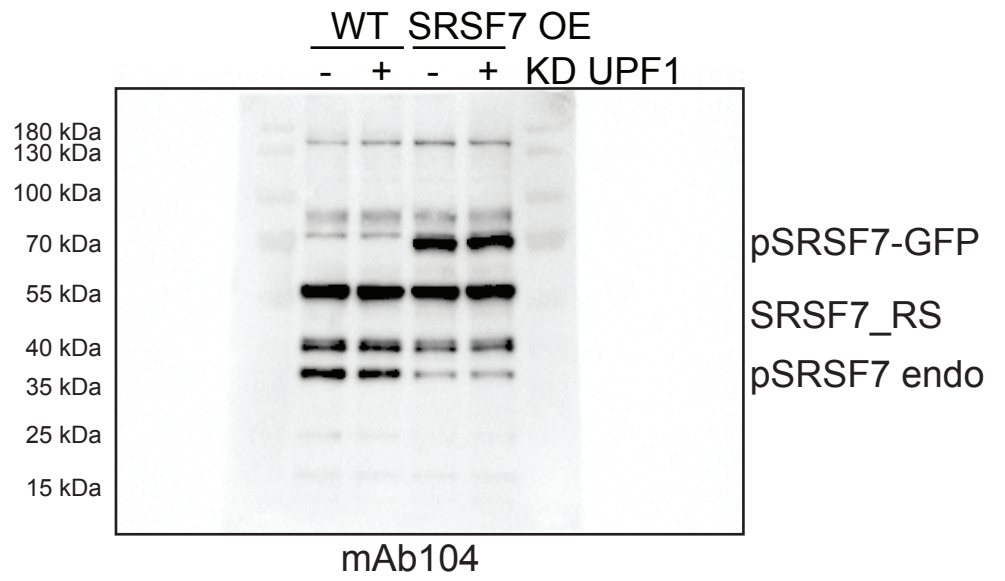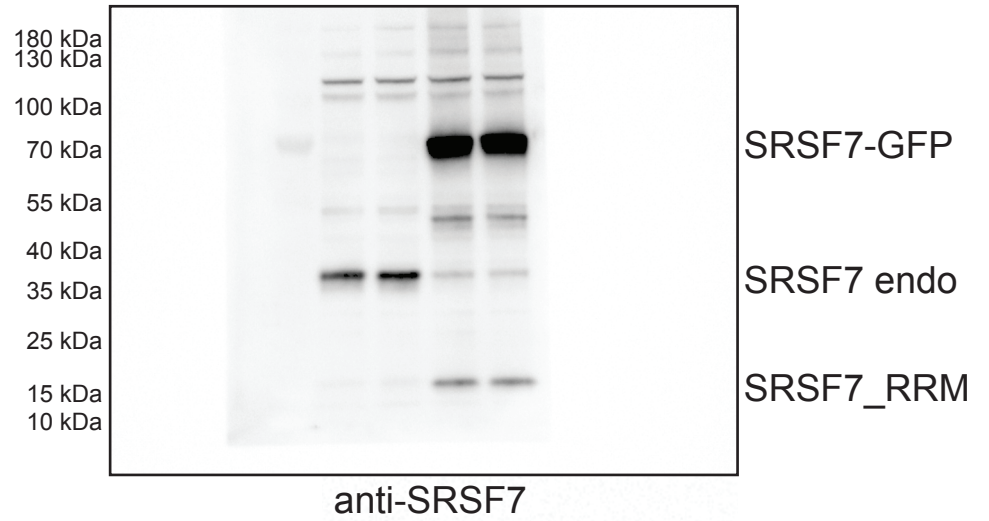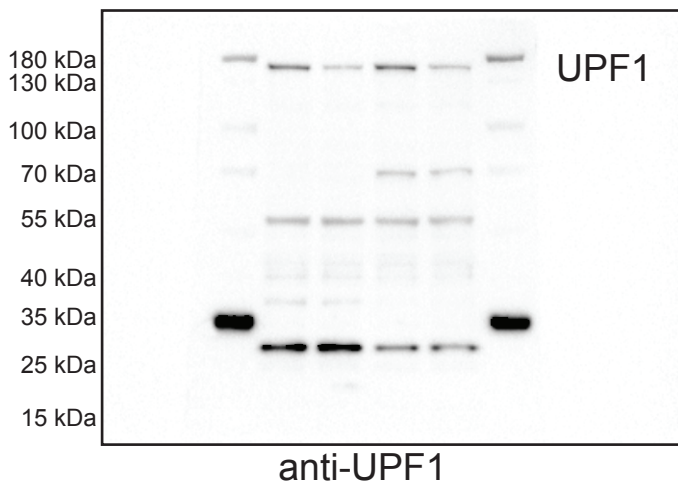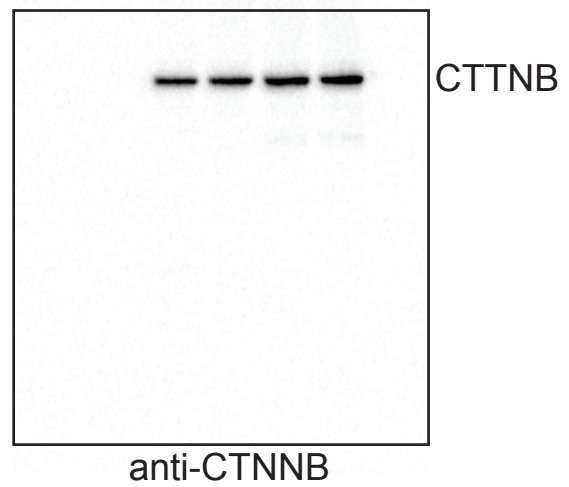

Source data Figure 2A

Supplement: 41594_2020_385_MOESM8_ESM.pdf [file 41594_2020_385_MOESM8_ESM.pdf]
